# Supplementary material for: Compliance with the 2018 World Cancer Research Fund/American Institute for Cancer Research Cancer Prevention Recommendations and Prostate Cancer
Source: MDPI journal article supplement (doi:10.3390/nu12030768), 2020-03-14
Supplement: s1 [file s1]

**Supplementary Table 1.** Characteristics of controls and PCa cases with and without WCRF/AICR score in CAPLIFE study.

|                                                                | Controls with<br>WCRF/AICR<br>score<br><i>n</i> = 302 | Controls without<br>WCRF/AICR<br>score<br><i>n</i> = 29 | PCa cases with<br>WCRF/AICR<br>score<br><i>n</i> = 398 | PCa cases without<br>WCRF/AICR score<br><i>n</i> = 47 |
|----------------------------------------------------------------|-------------------------------------------------------|---------------------------------------------------------|--------------------------------------------------------|-------------------------------------------------------|
| Age (years), mean (SD)                                         | 65.3 (8.2)                                            | 63.5 (6.4)                                              | 67.7 (7.4)                                             | 67.1 (8.0)                                            |
| <i>p</i> -value                                                |                                                       | 0.27                                                    |                                                        | 0.54                                                  |
| Age (years), <i>n</i> (%)                                      |                                                       |                                                         |                                                        |                                                       |
| 40 to 54                                                       | 39 (12.9)                                             | 3 (10.3)                                                | 21 (5.3)                                               | 4 (8.5)                                               |
| 55 to 69                                                       | 162 (53.7)                                            | 21 (72.4)                                               | 217 (54.5)                                             | 24 (51.1)                                             |
| 70 to 80                                                       | 101 (33.4)                                            | 5 (17.3)                                                | 160 (40.2)                                             | 19 (40.4)                                             |
| <i>p</i> -value                                                |                                                       | 0.14                                                    |                                                        | 0.65                                                  |
| Education, <i>n</i> (%)                                        |                                                       |                                                         |                                                        |                                                       |
| Primary                                                        | 92 (30.5)                                             | 12 (41.4)                                               | 119 (29.9)                                             | 26 (55.3)                                             |
| Secondary                                                      | 147 (48.7)                                            | 12 (41.4)                                               | 211 (53.0)                                             | 14 (29.8)                                             |
| University                                                     | 63 (20.8)                                             | 5 (17.2)                                                | 68 (17.1)                                              | 5 (10.6)                                              |
| Missing                                                        |                                                       |                                                         | -                                                      | 2 (4.3)                                               |
| <i>p</i> -value                                                |                                                       | 0.48                                                    |                                                        | <0.01                                                 |
| Smoking status, <i>n</i> (%)                                   |                                                       |                                                         |                                                        |                                                       |
| Never                                                          | 88 (29.1)                                             | 6 (20.7)                                                | 105 (26.4)                                             | 11 (23.4)                                             |
| Former                                                         | 157 (52.0)                                            | 14 (48.3)                                               | 212 (53.3)                                             | 23 (49.0)                                             |
| Current                                                        | 57 (18.9)                                             | 8 (27.6)                                                | 81 (20.3)                                              | 12 (25.5)                                             |
| Missing                                                        | -                                                     | 1 (3.4)                                                 |                                                        | 1 (2.1)                                               |
| <i>p</i> -value                                                |                                                       | 0.41                                                    |                                                        | 0.66                                                  |
| First-degree family history of PCa <sup>1</sup> , <i>n</i> (%) |                                                       |                                                         |                                                        |                                                       |
| No                                                             | 287 (95.0)                                            | 27 (93.0)                                               | 373 (93.7)                                             | 40 (85.1)                                             |
| Yes                                                            | 15 (5.0)                                              | 1 (3.5)                                                 | 25 (6.3)                                               | 1 (2.1)                                               |
| Unknown/Missing                                                | -                                                     | 1 (3.5)                                                 | -                                                      | 6 (12.8)                                              |
| <i>p</i> -value                                                |                                                       | 0.74                                                    |                                                        | 0.32                                                  |
| Aggressiveness, <i>n</i> (%)                                   |                                                       |                                                         |                                                        |                                                       |
| ISUP 1–2                                                       | -                                                     | -                                                       | 307 (77.1)                                             | 40 (85.1)                                             |
| ISUP 3–5                                                       | -                                                     | -                                                       | 91 (22.9)                                              | 6 (12.8)                                              |
| Unknown                                                        | -                                                     | -                                                       | -                                                      | 1 (2.1)                                               |
| <i>p</i> -value                                                |                                                       |                                                         |                                                        | 0.13                                                  |

SD, standard deviation. <sup>1</sup>First-degree history of PCa in father and/or brothers.

**Supplementary Table 2.** Mutually adjusted odds ratios and 95% confidence intervals for low and high aggressiveness PCa associated with the components of the 2018 WCRF/AICR score in CAPLIFE study.

| Components of the score             | Low aggressiveness PCa Cases |                                        |                 | High aggressiveness PCa Cases |                                        |                 |
|-------------------------------------|------------------------------|----------------------------------------|-----------------|-------------------------------|----------------------------------------|-----------------|
|                                     | N Controls/Cases             | aOR <sup>1</sup> (95% CI) <sup>2</sup> | <i>p</i> -trend | N Controls/Cases              | aOR <sup>1</sup> (95% CI) <sup>2</sup> | <i>p</i> -trend |
| 1. Be a healthy weight <sup>2</sup> |                              |                                        | 0.53            |                               |                                        | 0.12            |
| 0–0.25                              | 129/138                      | 1                                      |                 | 129/43                        | 1                                      |                 |
| 0.5                                 | 85/64                        | 0.70 (0.45–1.07)                       |                 | 85/23                         | 0.59 (0.31–1.10)                       |                 |
| 0.75–1                              | 88/105                       | 1.18 (0.79–1.77)                       |                 | 88/25                         | 0.61 (0.33–1.21)                       |                 |
| 2. Be physically active             |                              |                                        | 0.77            |                               |                                        | 0.47            |
| 0                                   | 227/242                      | 1                                      |                 | 227/73                        | 1                                      |                 |
| 0.5                                 | 17/11                        | 0.54 (0.23–1.23)                       |                 | 17/3                          | 0.51 (0.13–1.96)                       |                 |
| 1                                   | 58/54                        | 0.98 (0.63–1.53)                       |                 | 58/15                         | 0.82 (0.41–1.63)                       |                 |

|                                                                                                |         |                  |        |                         |      |
|------------------------------------------------------------------------------------------------|---------|------------------|--------|-------------------------|------|
| 3. Eat a diet rich in whole grains, vegetables, fruit and beans <sup>3</sup>                   |         |                  | 0.74   |                         | 0.62 |
| 0–0.25                                                                                         | 14/11   | 1                | 14/4   | 1                       |      |
| 0.5                                                                                            | 16/22   | 1.73 (0.56–5.21) | 16/4   | 0.72 (0.13–3.87)        |      |
| 0.75–1                                                                                         | 272/274 | 1.40 (0.56–3.51) | 272/83 | 0.70 (0.19–2.51)        |      |
| 4. Limit consumption of ‘fast foods’ and other processed foods high in fat, starches or sugars |         |                  | 0.01   |                         | 0.40 |
| 0                                                                                              | 101/127 | 1                | 101/36 | 1                       |      |
| 0.5                                                                                            | 100/102 | 0.78 (0.52–1.16) | 100/23 | 0.61 (0.32–1.16)        |      |
| 1                                                                                              | 101/78  | 0.57 (0.37–0.88) | 101/32 | 0.77 (0.42–1.45)        |      |
| 5. Limit consumption of red and processed meat                                                 |         |                  | 0.44   |                         | 0.24 |
| 0                                                                                              | 231/231 | 1                | 231/66 | 1                       |      |
| 0.5                                                                                            | 65/63   | 0.95 (0.60–1.48) | 65/19  | 1.02 (0.44–1.98)        |      |
| 1                                                                                              | 6/13    | 2.26 (0.79–6.44) | 6/6    | 3.45 (0.92–12.95)       |      |
| 6. Limit consumption of sugar- sweetened drinks                                                |         |                  | <0.01  |                         | 0.70 |
| 0                                                                                              | 7/20    | 1                | 7/5    | 1                       |      |
| 0.5                                                                                            | 132/144 | 0.36 (0.14–0.94) | 132/35 | 0.47 (0.12–1.78)        |      |
| 1                                                                                              | 163/143 | 0.26 (0.10–0.69) | 163/51 | 0.49 (0.13–1.89)        |      |
| 7. Limit alcohol consumption                                                                   |         |                  | 0.01   |                         | 0.40 |
| 0                                                                                              | 31/48   | 1                | 31/19  | 1                       |      |
| 0.5                                                                                            | 215/212 | 0.61 (0.35–1.05) | 215/50 | <b>0.39 (0.19–0.82)</b> |      |
| 1                                                                                              | 56/47   | 0.43 (0.22–0.84) | 56/22  | 0.58 (0.24–1.41)        |      |

N, number; 95% CI, 95% confidence interval; <sup>1</sup> aOR, Odds ratio adjusted for each individual component of the score and potential confounders (age, educational level, smoking status, primary family history of PCa and total energy intake). <sup>2</sup> For recommendations based on subitem, the possible scores could be: 0, 0.25, 0.5, 0.75 and 1, which were recategorized at 0 to 0.25, 0.5 and 0.75–1.
